# Supplementary material for: Probing the Inhibitor versus Chaperone Properties of sp2-Iminosugars towards Human β-Glucocerebrosidase: A Picomolar Chaperone for Gaucher Disease
Source: Molecules. 2018 Apr 17;23(4):927. doi: 10.3390/molecules23040927 (PMC6017062; doi:10.3390/molecules23040927)
Supplement: Supplementary file 1 [file molecules-23-00927-s001.pdf]

# **Probing the inhibitor versus chaperone properties of sp<sup>2</sup>-iminosugars towards human $\beta$ -glucocerebrosidase: A picomolar chaperone for Gaucher disease**

**Teresa Mena-Barragán<sup>1</sup>, M. Isabel García-Moreno<sup>1</sup>, Alen Sevšek<sup>2</sup>, Tetsuya Okazaki,<sup>3</sup> Eiji Nanba,<sup>4</sup> Katsumi Higaki<sup>4,\*</sup>, Nathaniel I. Martin,<sup>2,\*</sup> Roland J. Pieters<sup>2,\*</sup>, José Manuel García Fernández<sup>5,\*</sup>, Carmen Ortiz Mellet<sup>1,\*</sup>**

## **Supplementary Information**

### **List of contents**

|            |                                                         |
|------------|---------------------------------------------------------|
| S1 to S12  | NMR spectra of compounds <b>4-15</b> .                  |
| S13 to S33 | Dixon and Lineweaver-Burk plots for $K_i$ determination |

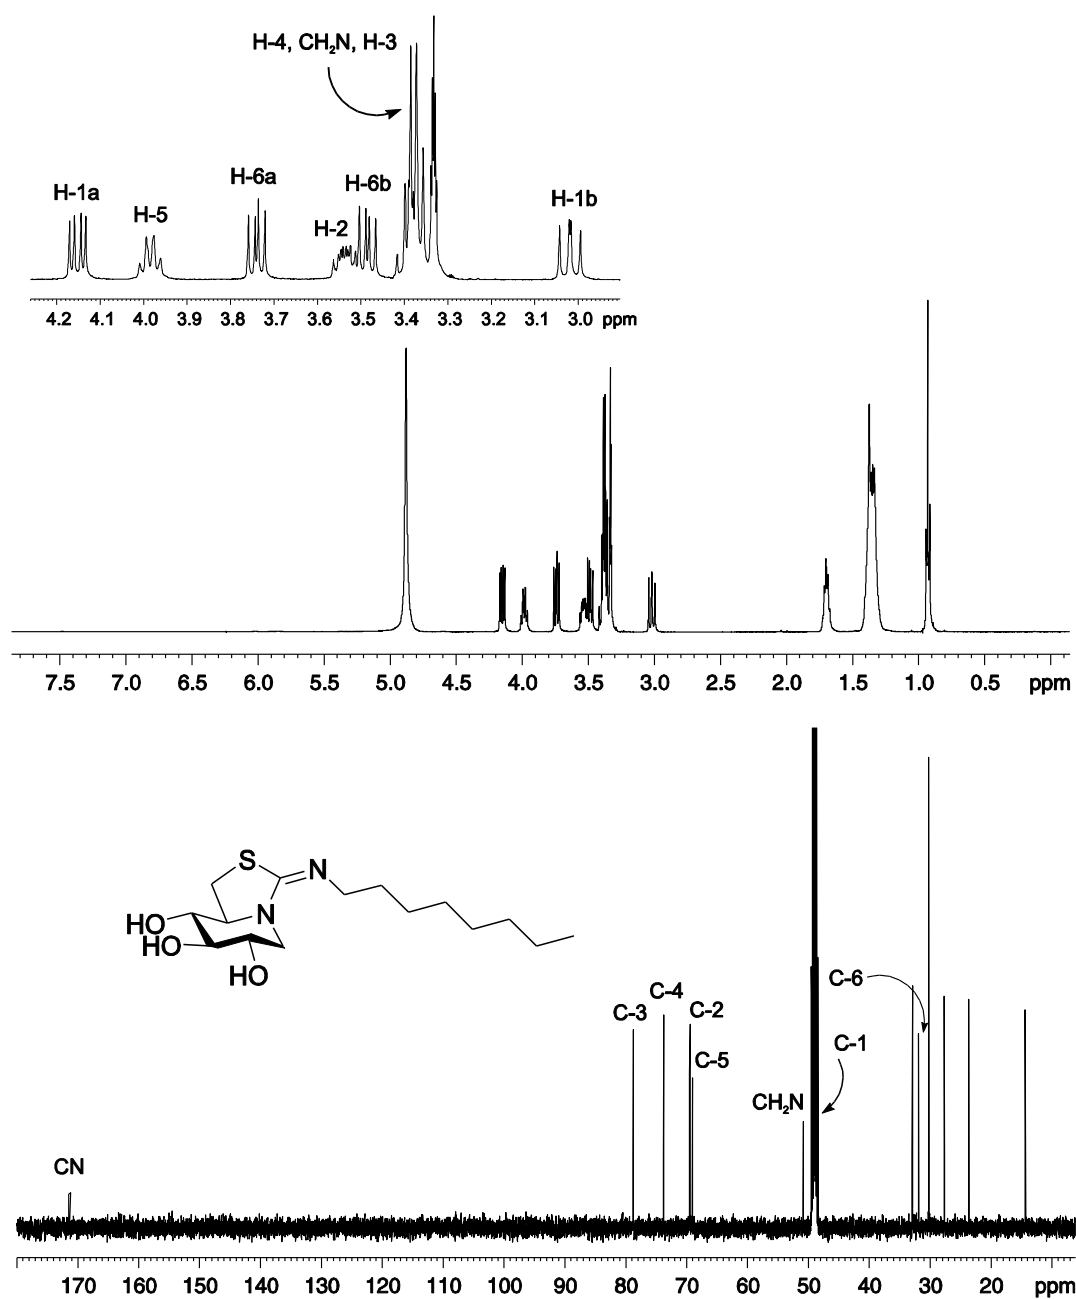

**Figure S1.**  $^1\text{H}$  and  $^{13}\text{C}$  RMN spectra (500 MHz, 125.7 MHz,  $\text{CD}_3\text{OD}$ ) of **4**.

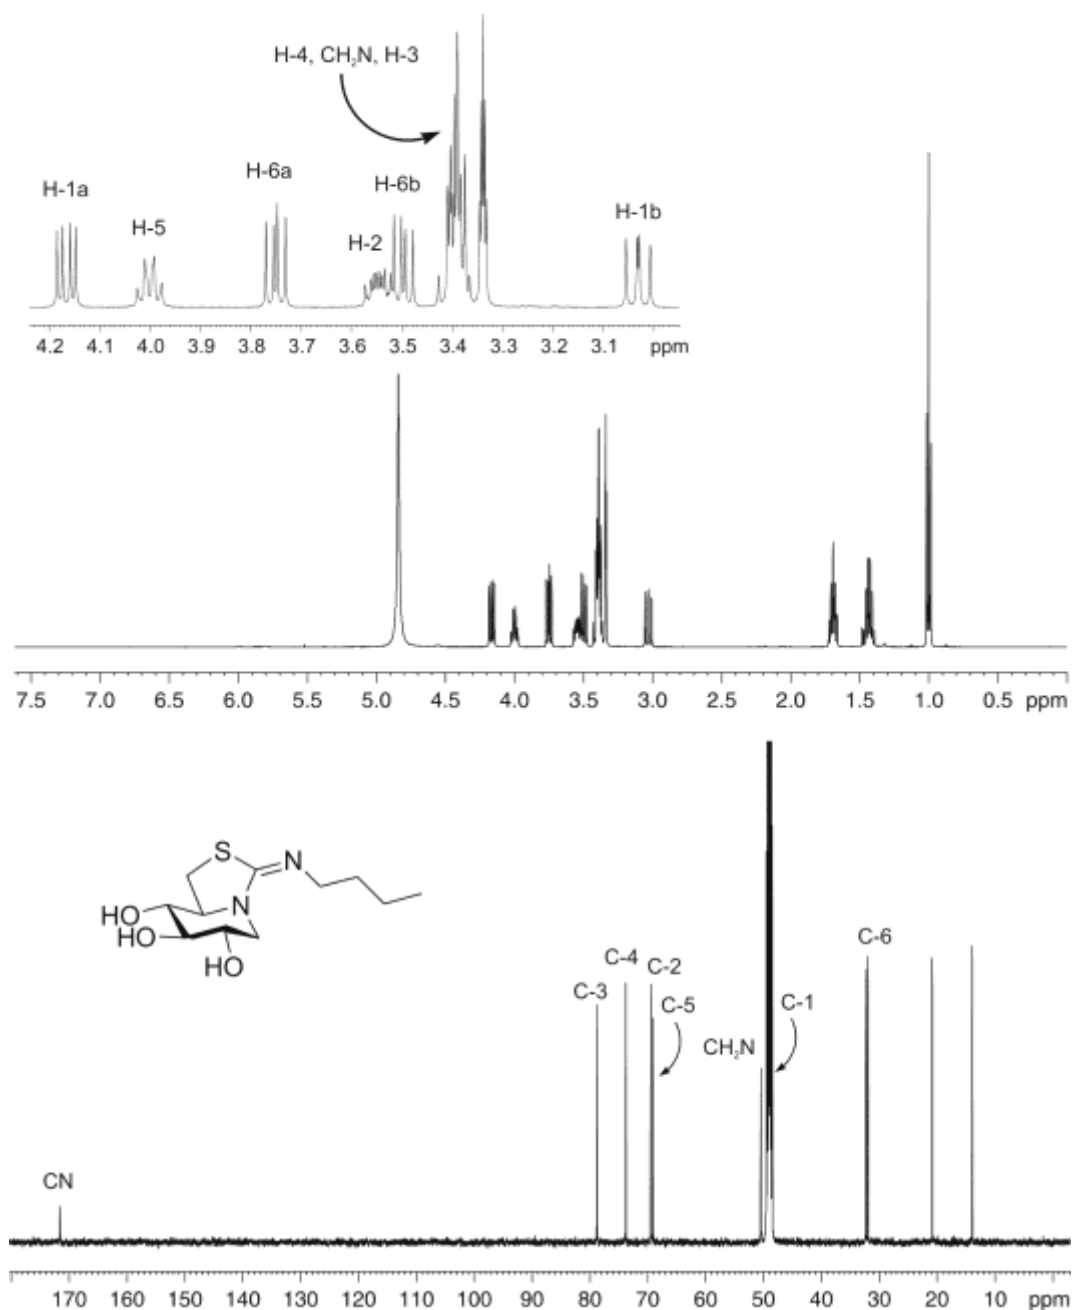

**Figure S2.**  $^1\text{H}$  and  $^{13}\text{C}$  NMR spectra (500 MHz, 125.7 MHz,  $\text{CD}_3\text{OD}$ ) of **5**.

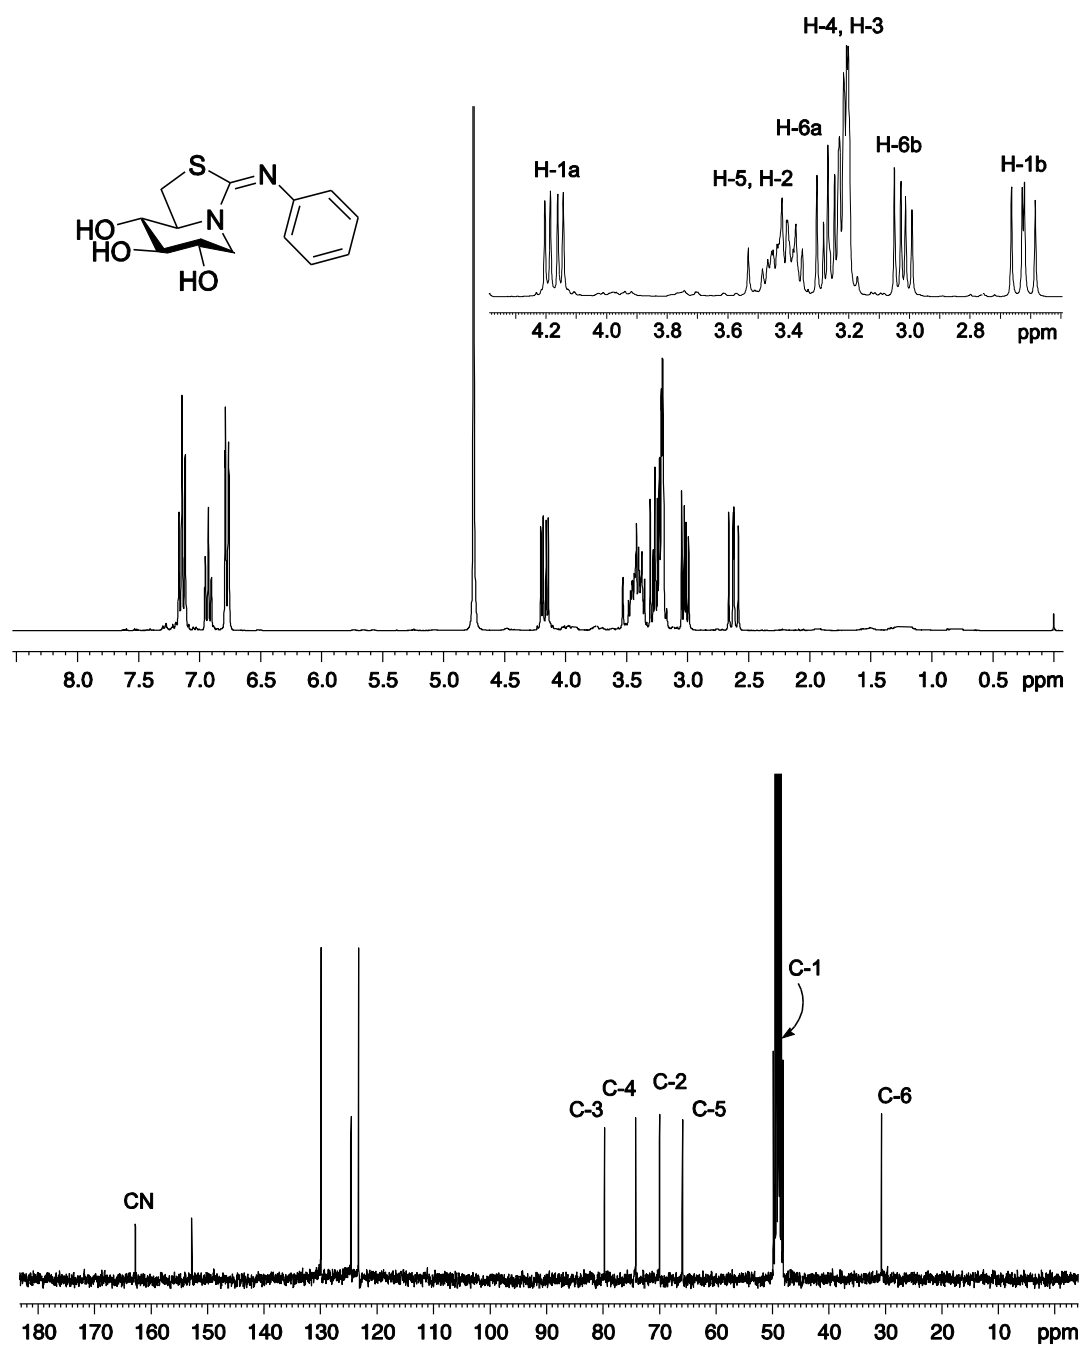

Figure S3. <sup>1</sup>H and <sup>13</sup>C NMR spectra (300 MHz, 75.5 MHz, CD<sub>3</sub>OD) of 6.

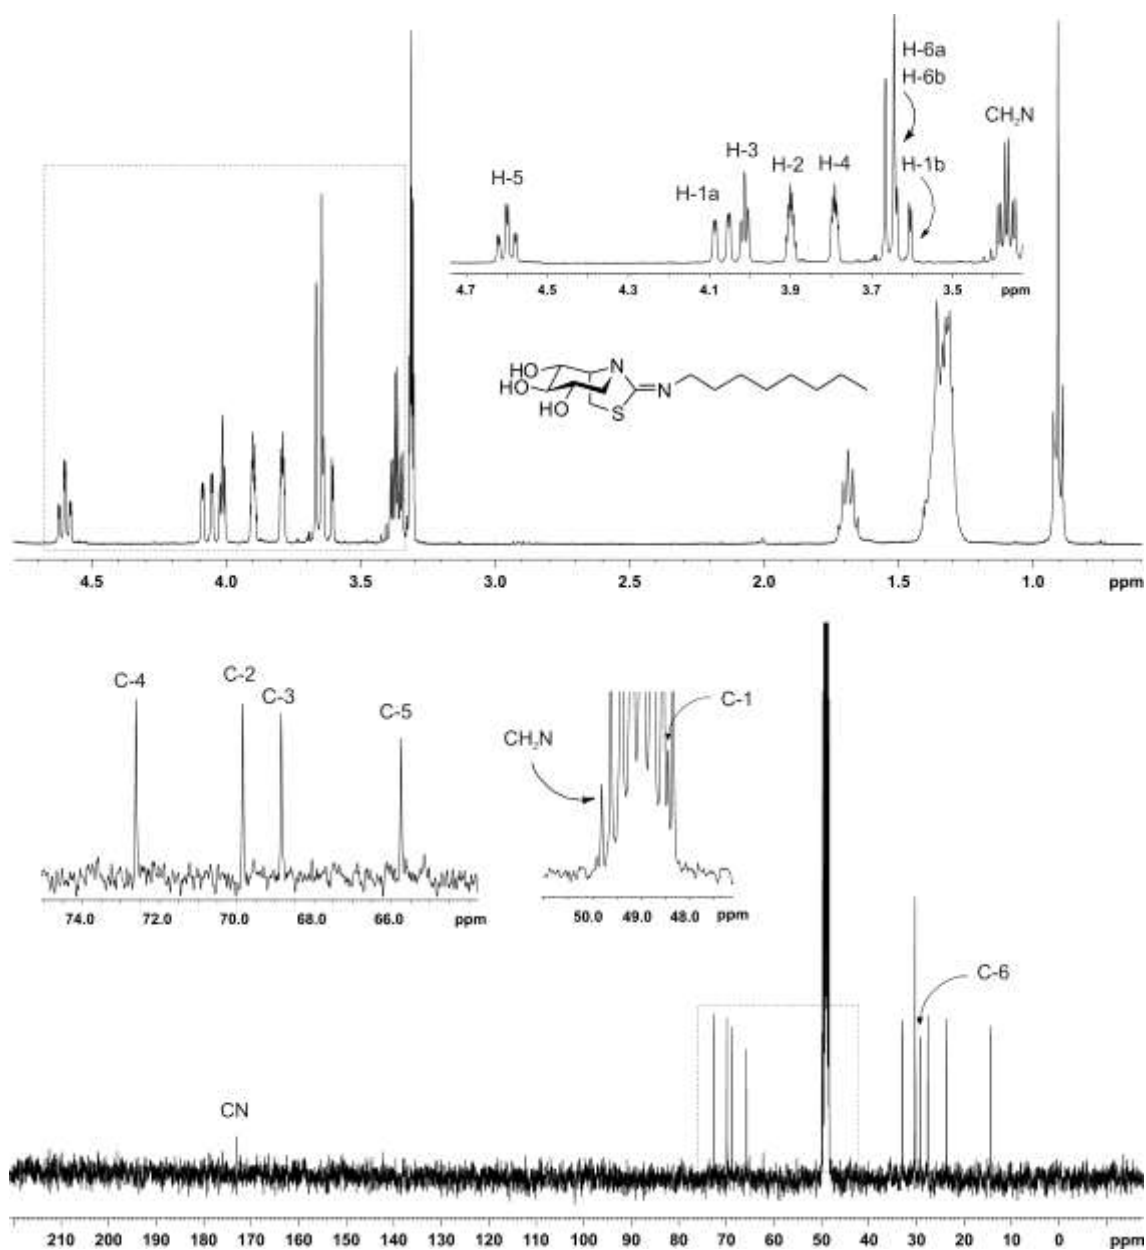

**Figure S4.**  $^1\text{H}$  and  $^{13}\text{C}$  NMR spectra (400 MHz, 100.6 MHz,  $\text{CD}_3\text{OD}$ ) of **7**.

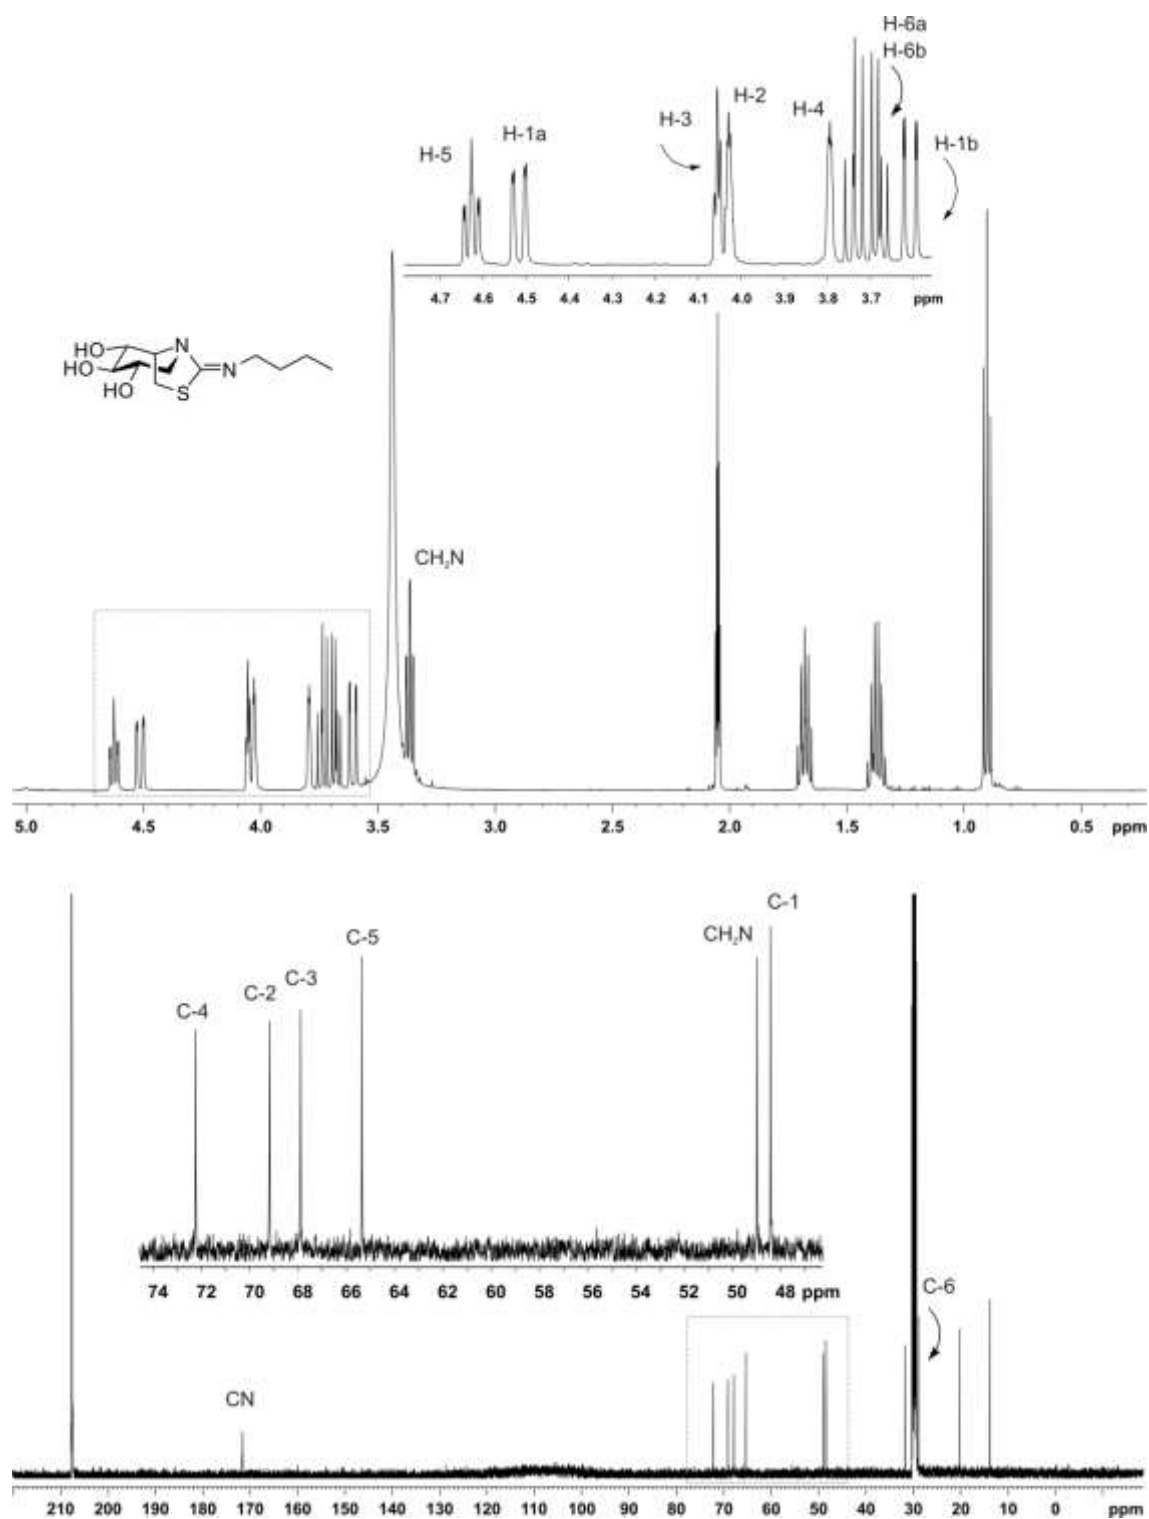

**Figure S5:**  $^1\text{H}$  and  $^{13}\text{C}$  NMR spectra (500 MHz, 125.7 MHz, 9:1 acetone- $d_6$ - $\text{D}_2\text{O}$ ) of **8**.

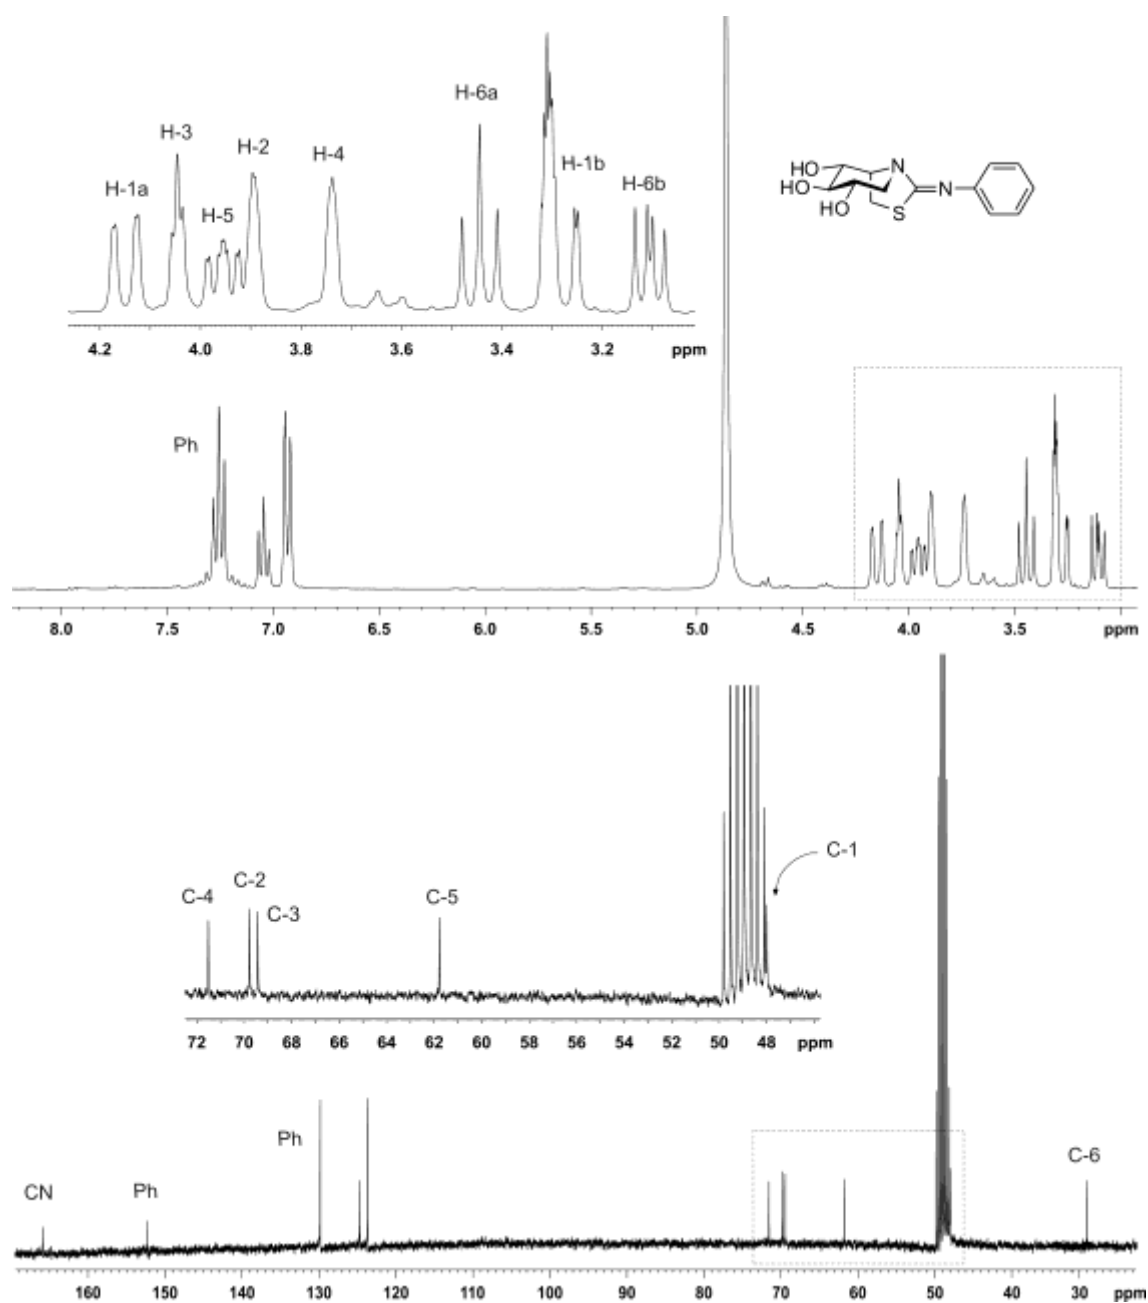

**Figure S6.**  $^1\text{H}$  and  $^{13}\text{C}$  NMR spectra (300 MHz, 75.5 MHz,  $\text{CD}_3\text{OD}$ ) of **9**.

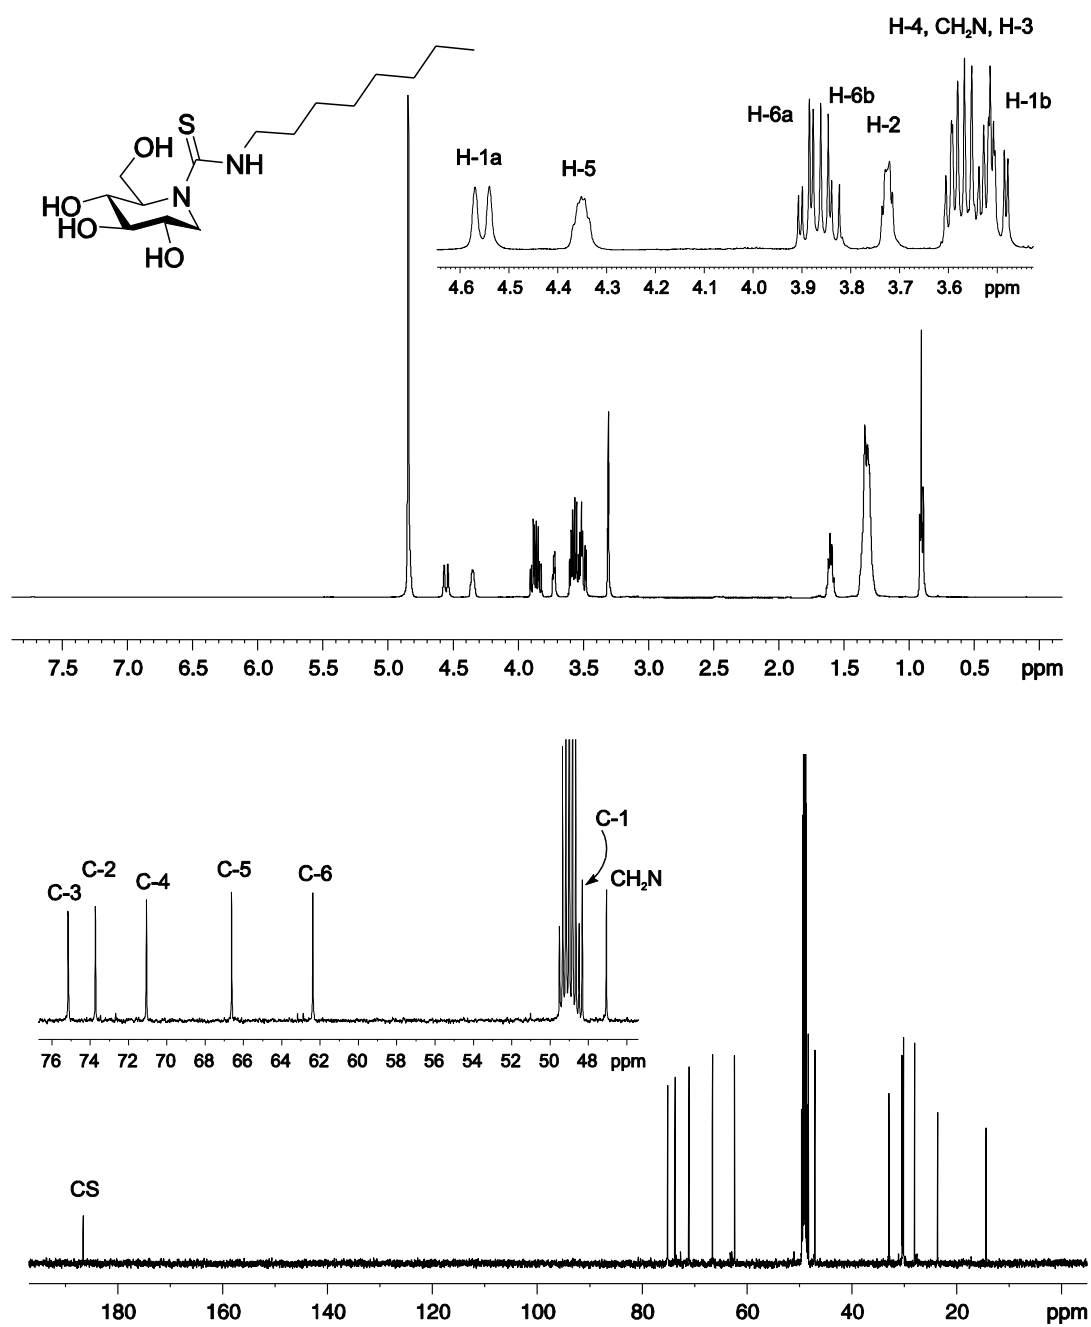

**Figure S7.**  $^1\text{H}$  and  $^{13}\text{C}$  RMN spectra (500 MHz, 125.7 MHz,  $\text{CD}_3\text{OD}$ ) of **10**.

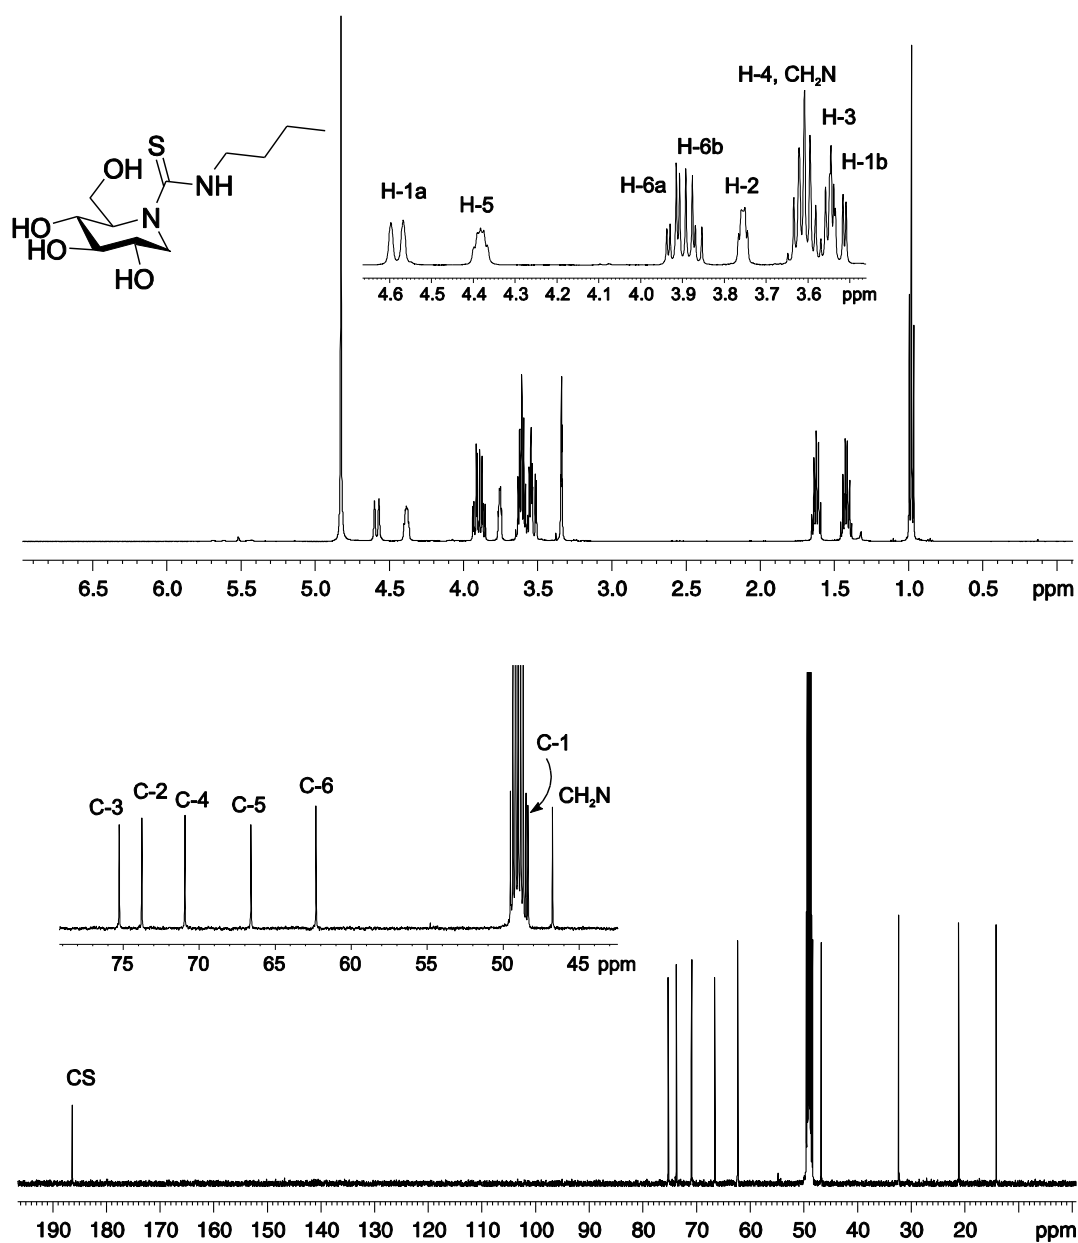

Figure S8.  $^1\text{H}$  and  $^{13}\text{C}$  NMR spectra (500 MHz, 125.7 MHz,  $\text{CD}_3\text{OD}$ ) of 11.

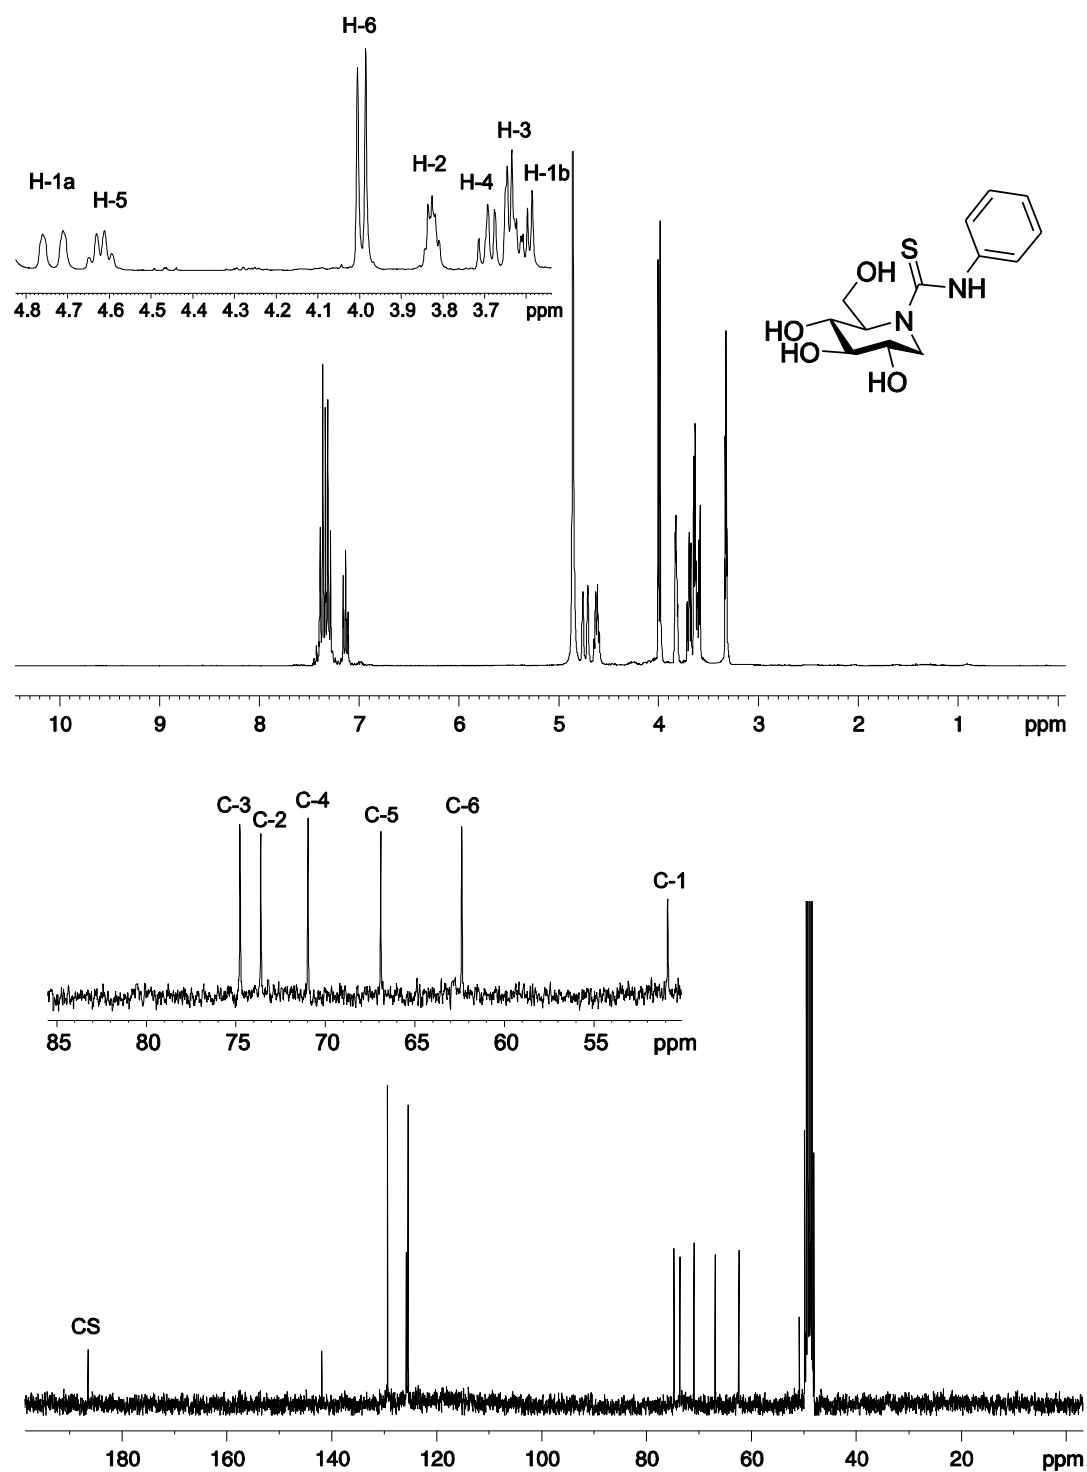

Figure S9.  $^1\text{H}$  and  $^{13}\text{C}$  NMR spectra (300 MHz, 75.5 MHz,  $\text{CD}_3\text{OD}$ ) of **12**.

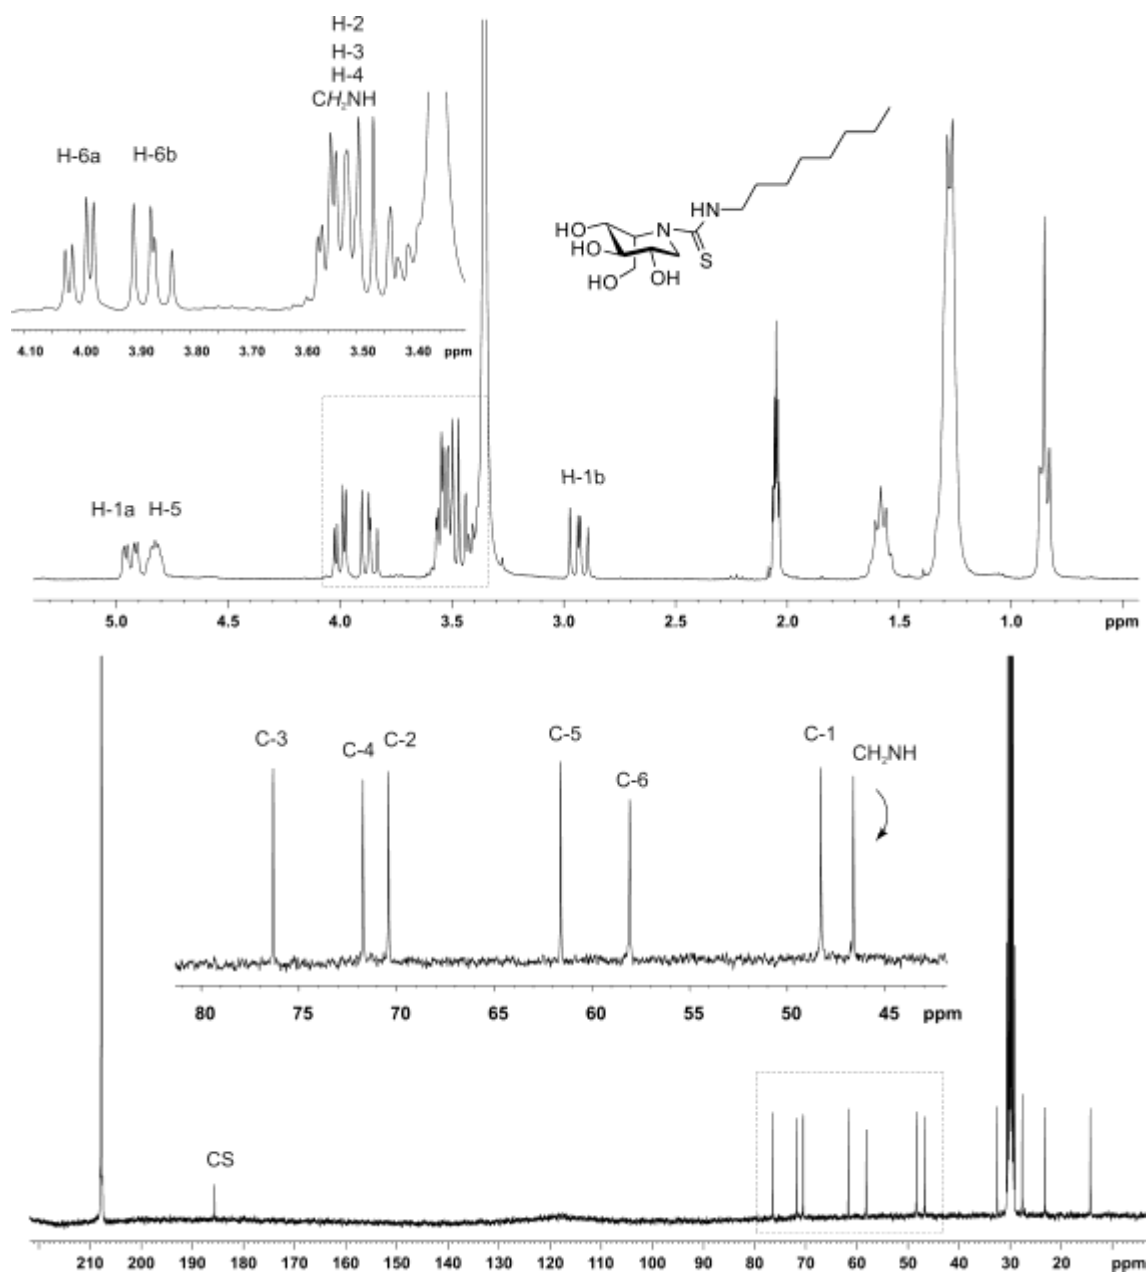

**Figure S10.**  $^1\text{H}$  and  $^{13}\text{C}$  NMR spectra (300 MHz, 75.5 MHz, 9:1 acetone- $d_6$ - $\text{D}_2\text{O}$ , 313 K) of **13**.

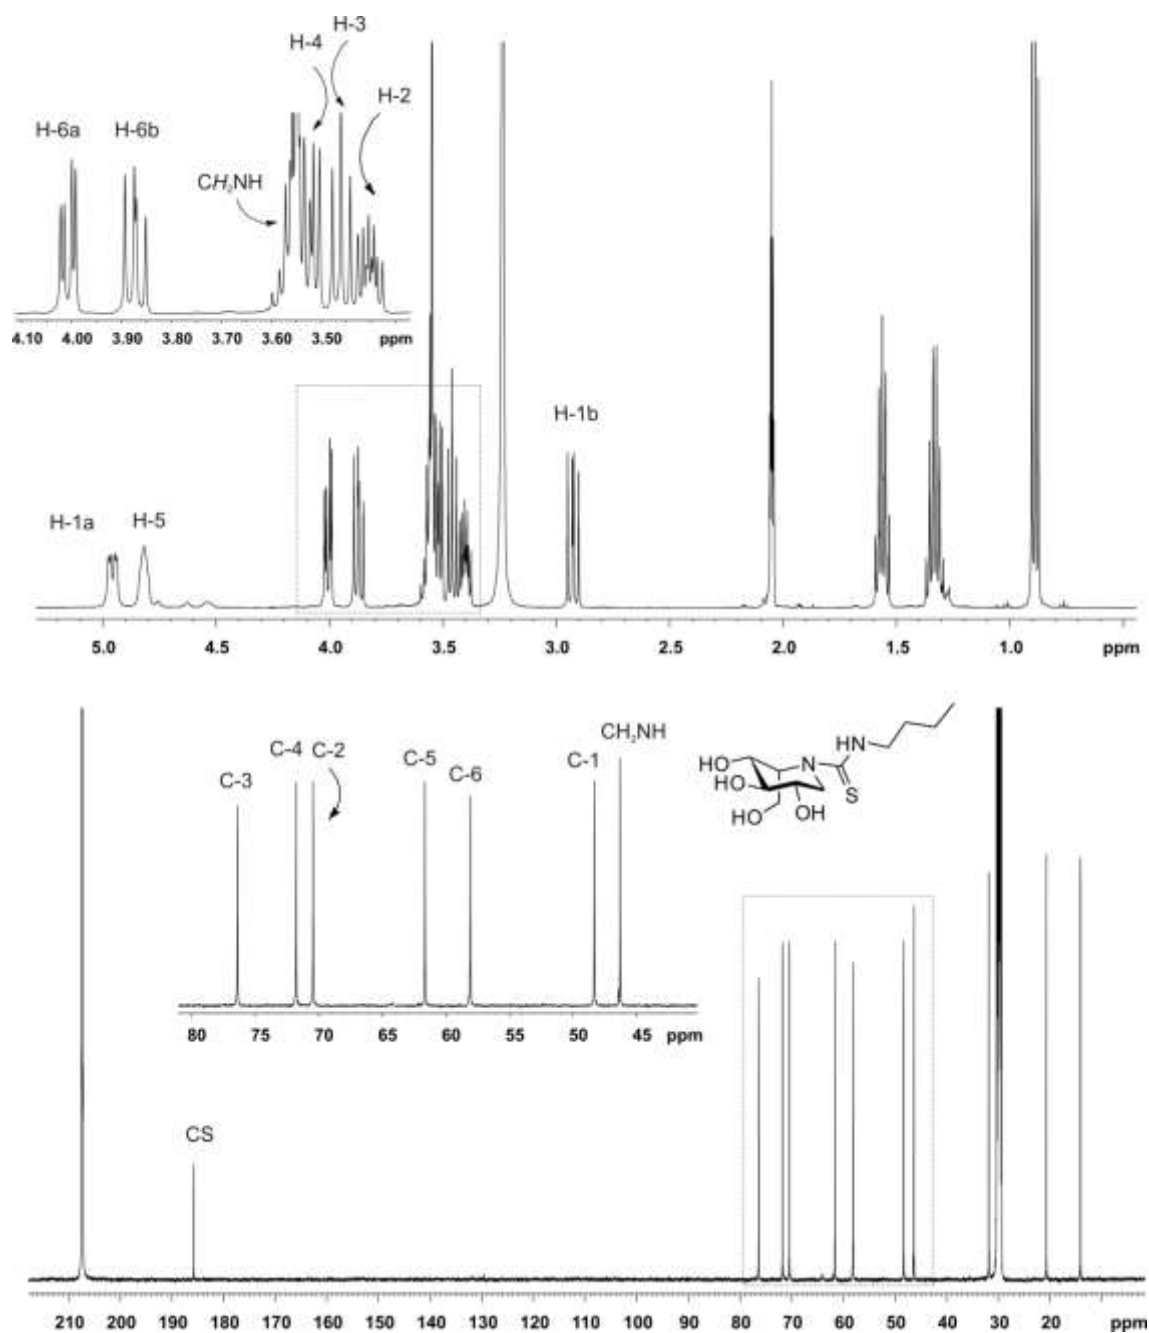

**Figure S11.**  $^1\text{H}$  and  $^{13}\text{C}$  NMR spectra (500 MHz, 125.7 MHz, 9:1 acetone- $d_6$ -D<sub>2</sub>O, 313 K) of **14**.

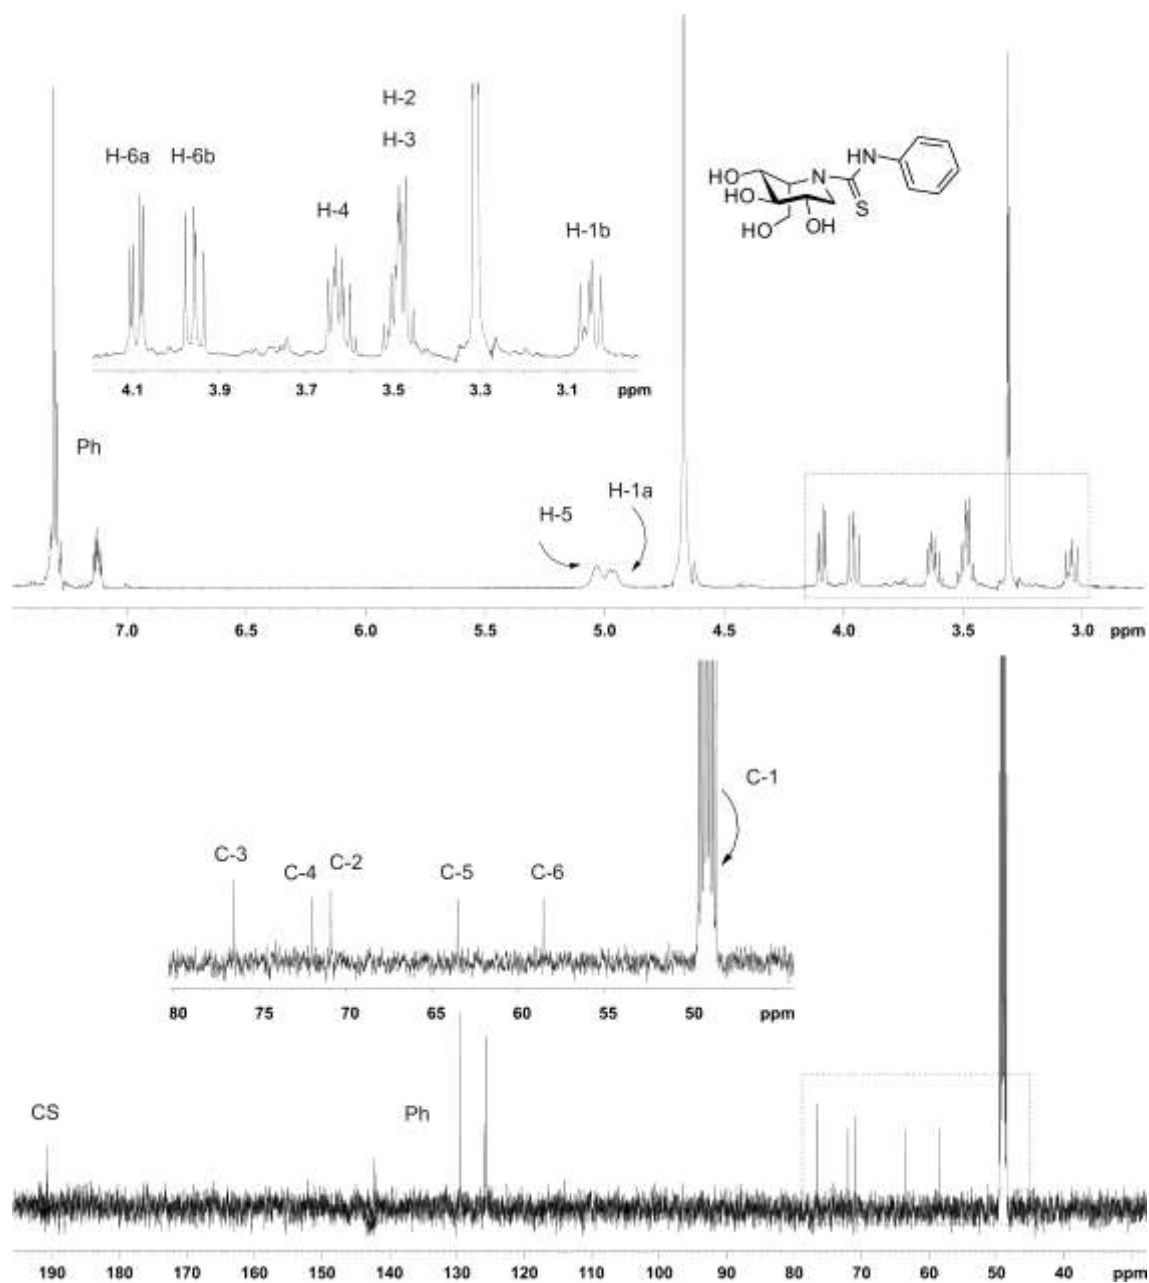

**Figure S12.**  $^1\text{H}$  and  $^{13}\text{C}$  NMR spectra (500 MHz, 125.7 MHz,  $\text{CD}_3\text{OD}$ , 313 K) of **15**.

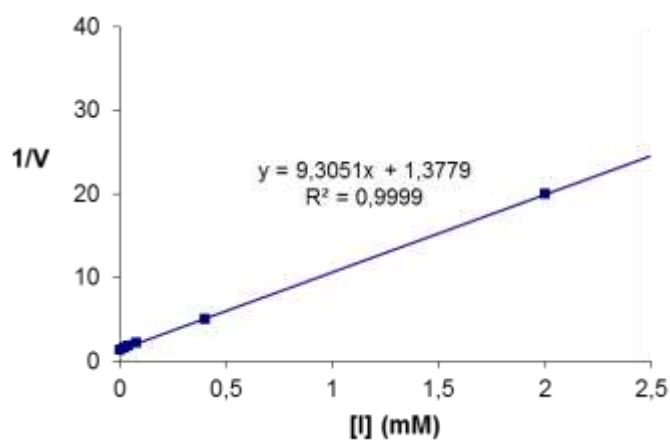

**Figure S13.** Dixon Plot for  $K_i$  determination ( $60 \pm 4 \mu\text{M}$ ) of **12** against yeast maltase.

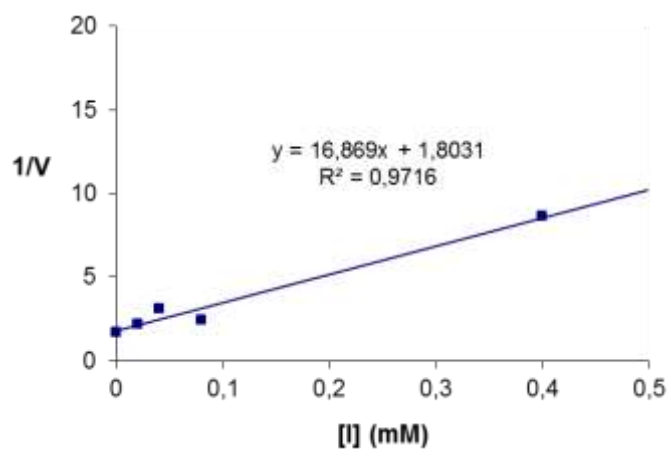

**Figure S14.** Dixon Plot for  $K_i$  determination ( $44 \pm 3 \mu\text{M}$ ) of **6** against isomaltase.

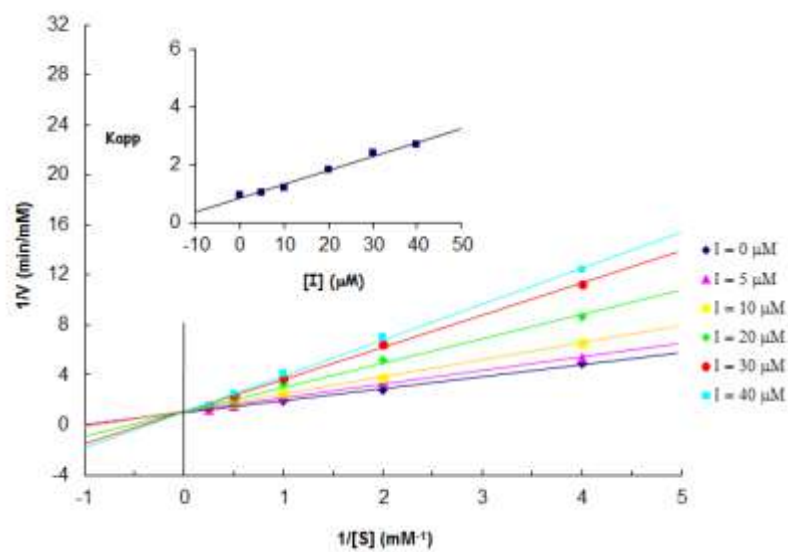

**Figure S15.** Lineweaver-Burk Plot for  $K_i$  determination ( $18 \pm 2 \mu\text{M}$ ) of **12** against isomaltase.

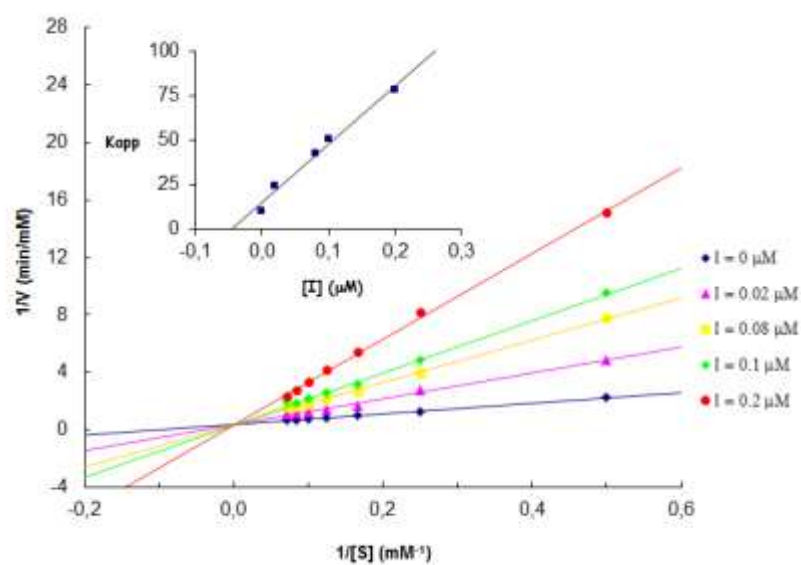

**Figure S16.** Lineweaver-Burk Plot for  $K_i$  determination ( $0.045 \pm 0.002 \mu\text{M}$ ) of **4** against almonds  $\beta$ -glucosidase.

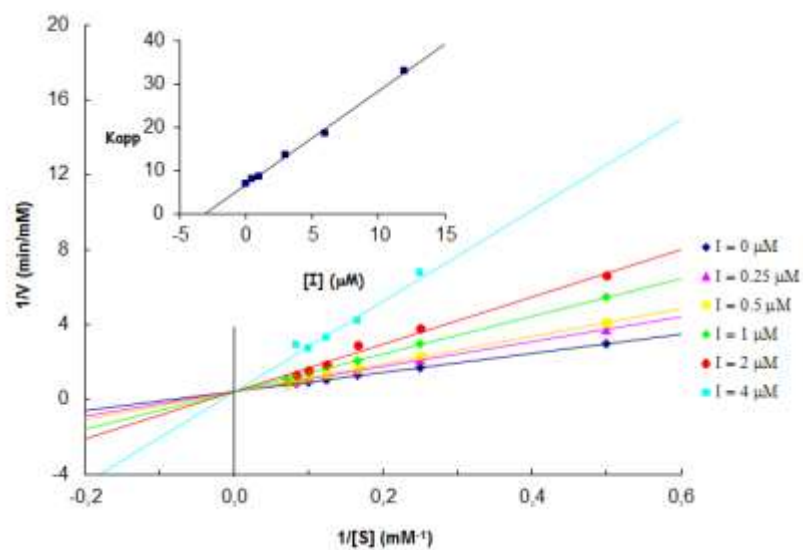

**Figure S17.** Lineweaver-Burk Plot for  $K_i$  determination ( $1.1 \pm 0.1$   $\mu$ M) of **5** against almonds  $\beta$ -glucosidase.

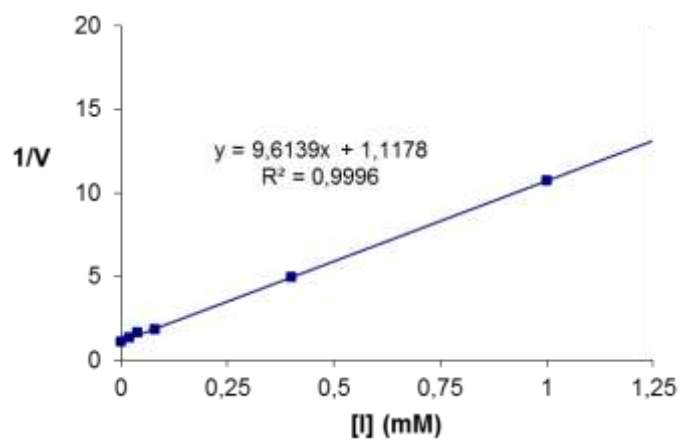

**Figure S18.** Dixon Plot for  $K_i$  determination ( $48 \pm 4$   $\mu$ M) of **6** against almonds  $\beta$ -glucosidase.

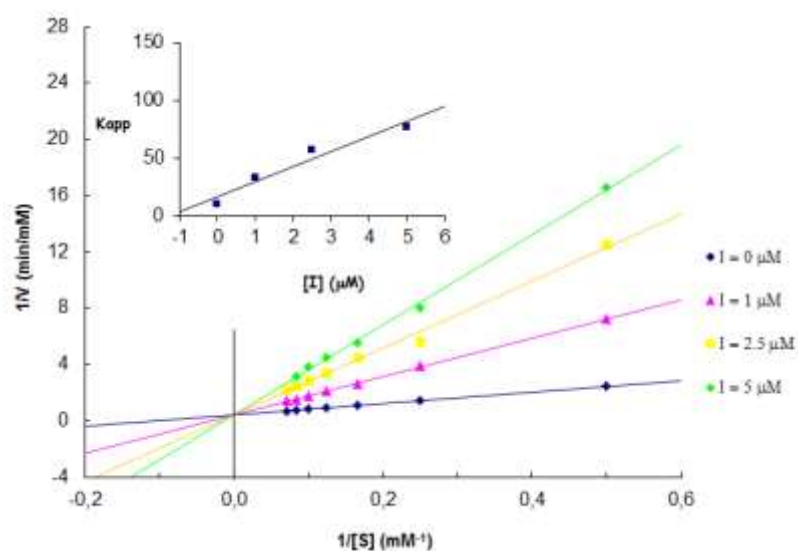

**FigureS19.** Lineweaver-Burk Plot for  $K_i$  determination ( $1.3 \pm 0.1$   $\mu$ M) of **10** against almonds  $\beta$ -glucosidase.

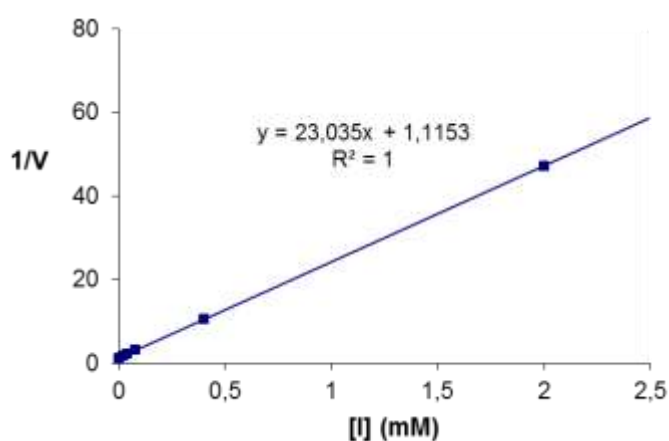

**Figure S20.** Dixon Plot for  $K_i$  determination ( $20 \pm 2$   $\mu$ M) of **11** against almonds  $\beta$ -glucosidase.

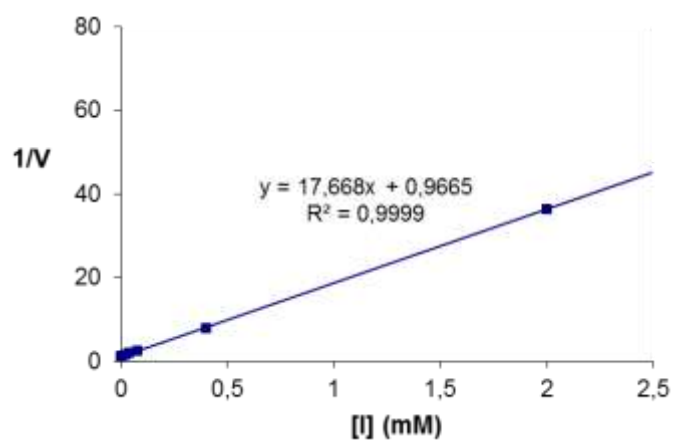

**Figure S21.** Dixon Plot for  $K_i$  determination ( $23 \pm 3 \mu\text{M}$ ) of **12** against almonds  $\beta$ -glucosidase.

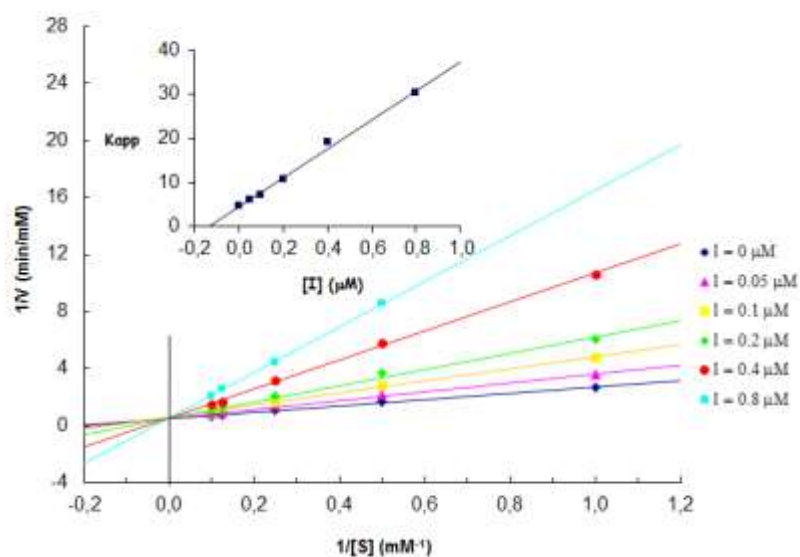

**Figure S22** Lineweaver-Burk Plot for  $K_i$  determination ( $0.1 \pm 0.02 \mu\text{M}$ ) of **4** against bovine liver  $\beta$ -glucosidase.

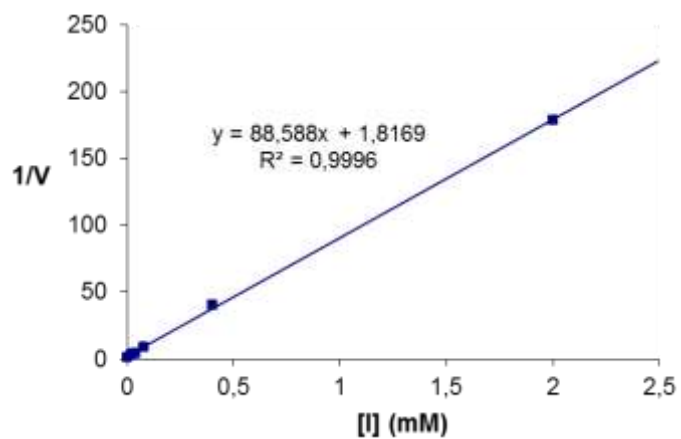

**Figure S23.** Dixon Plot for  $K_i$  determination ( $5.8 \pm 0.5 \mu\text{M}$ ) of **5** against bovine liver  $\beta$ -glucosidase.

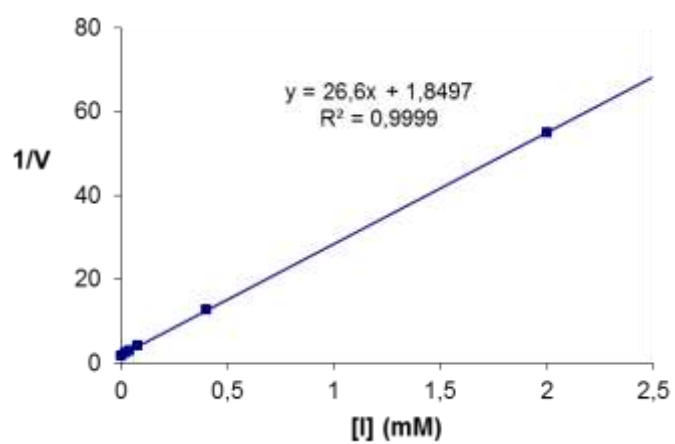

**Figure S24.** Dixon Plot for  $K_i$  determination ( $15 \pm 1 \mu\text{M}$ ) of **6** against bovine liver  $\beta$ -glucosidase.

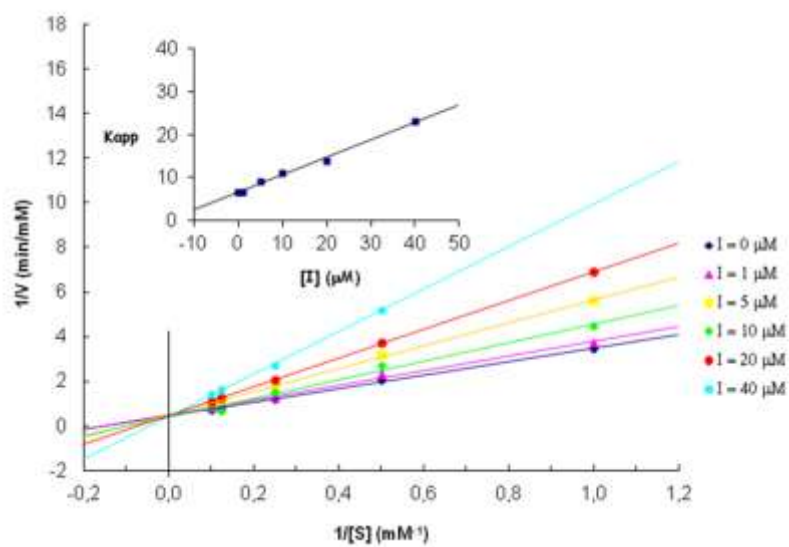

**Figure S25.** Dixon Plot for  $K_i$  determination ( $15 \pm 2 \mu$ M) of **7** against bovine liver  $\beta$ -glucosidase.

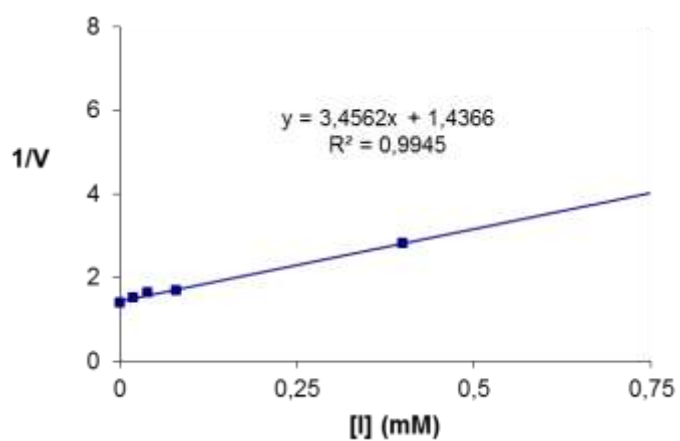

**Figure S26.** Dixon Plot for  $K_i$  determination ( $185 \pm 14 \mu$ M) of **8** against bovine liver  $\beta$ -glucosidase.

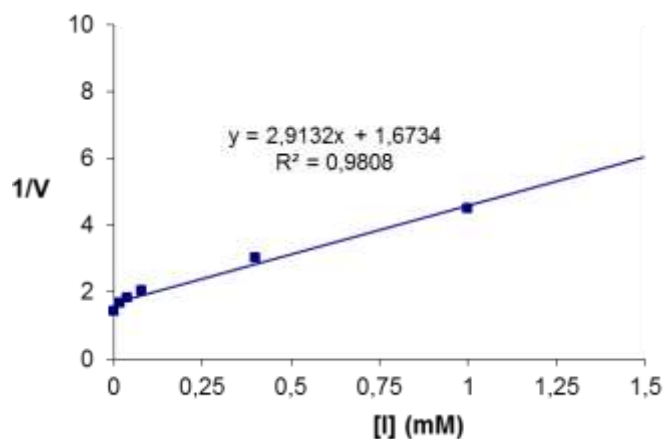

**Figure S27.** Dixon Plot for  $K_i$  determination ( $255 \pm 20 \mu\text{M}$ ) of **9** against bovine liver  $\beta$ -glucosidase.

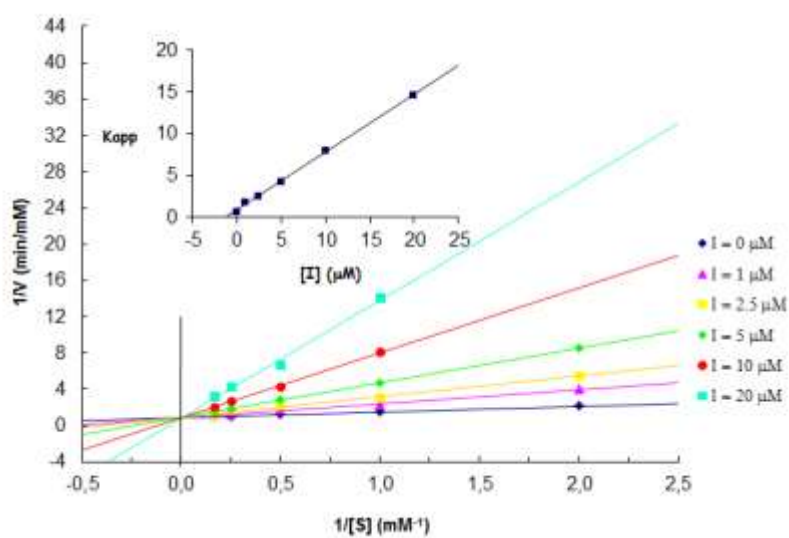

**Figure S28.** Lineweaver-Burk Plot for  $K_i$  determination ( $1.3 \pm 0.1 \mu\text{M}$ ) of **10** against bovine liver  $\beta$ -glucosidase.

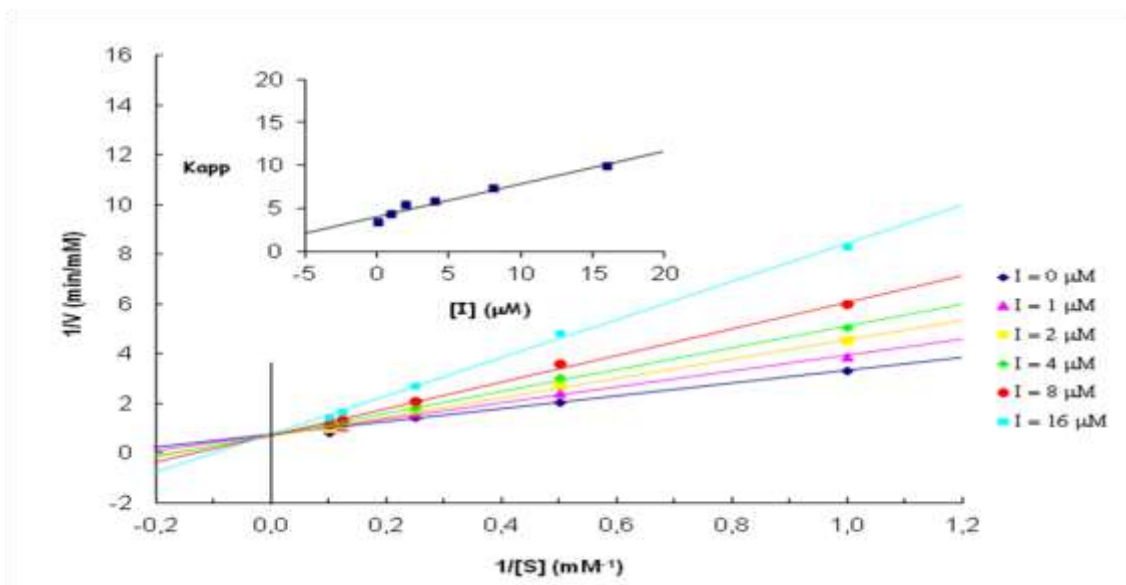

**Figure S29.** Lineweaver-Burk Plot for  $K_i$  determination ( $12.7 \pm 0.1 \mu\text{M}$ ) of **11** against bovine liver  $\beta$ -glucosidase.

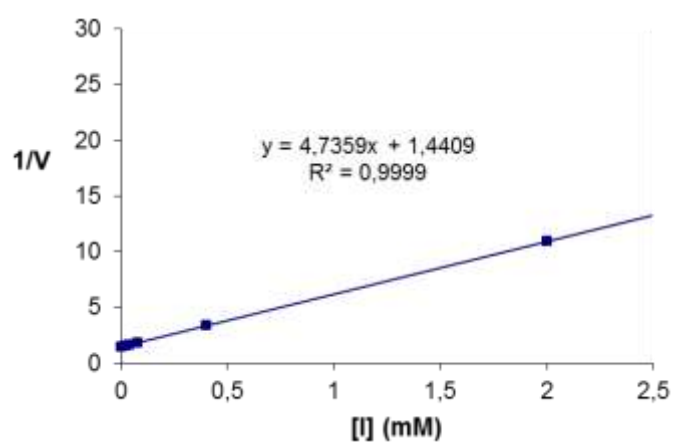

**Figure S30.** Dixon Plot for  $K_i$  determination ( $71 \pm 8 \mu\text{M}$ ) of **12** against bovine liver  $\beta$ -glucosidase.

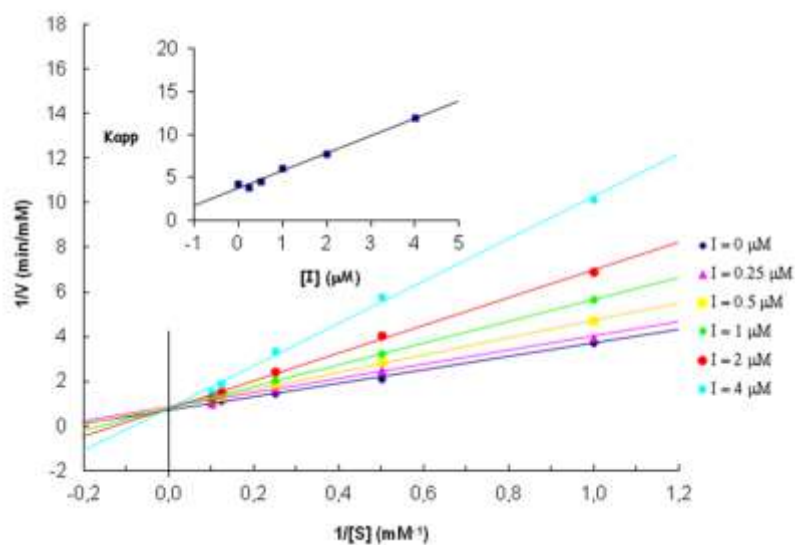

**Figure S31.** Lineweaver-Burk Plot for  $K_i$  determination ( $2.3 \pm 0.2 \mu\text{M}$ ) of **13** against bovine liver  $\beta$ -glucosidase.

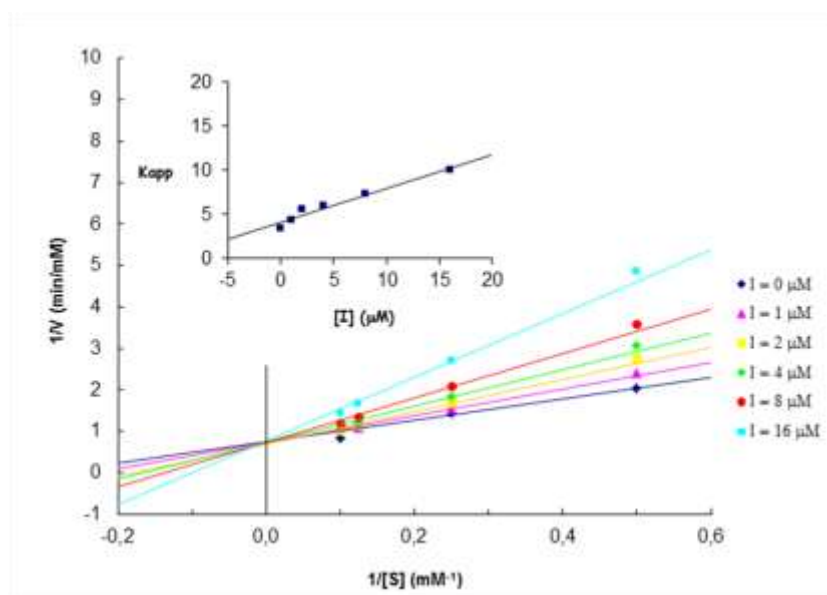

**Figure S32.** Lineweaver-Burk Plot for  $K_i$  determination ( $11 \pm 1 \mu\text{M}$ ) of **14** against bovine liver  $\beta$ -glucosidase.

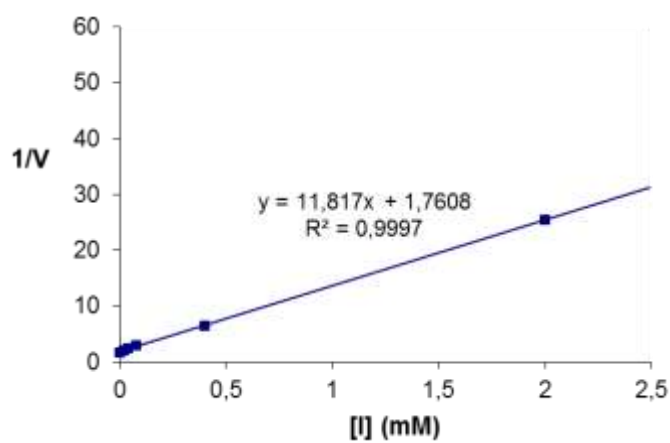

**Figure S33.** Dixon Plot for  $K_i$  determination ( $66 \pm 15 \mu\text{M}$ ) of **15** against bovine liver  $\beta$ -glucosidase.
